# Supplementary material
Source: PubMed Central journal article supplement (PMC5047074)
Supplement: supp_pp.16.00464_PP2016-00464DR1_Supplemental_Fig_S3.pdf [file supp_pp.16.00464_PP2016-00464DR1_Supplemental_Fig_S3.pdf]

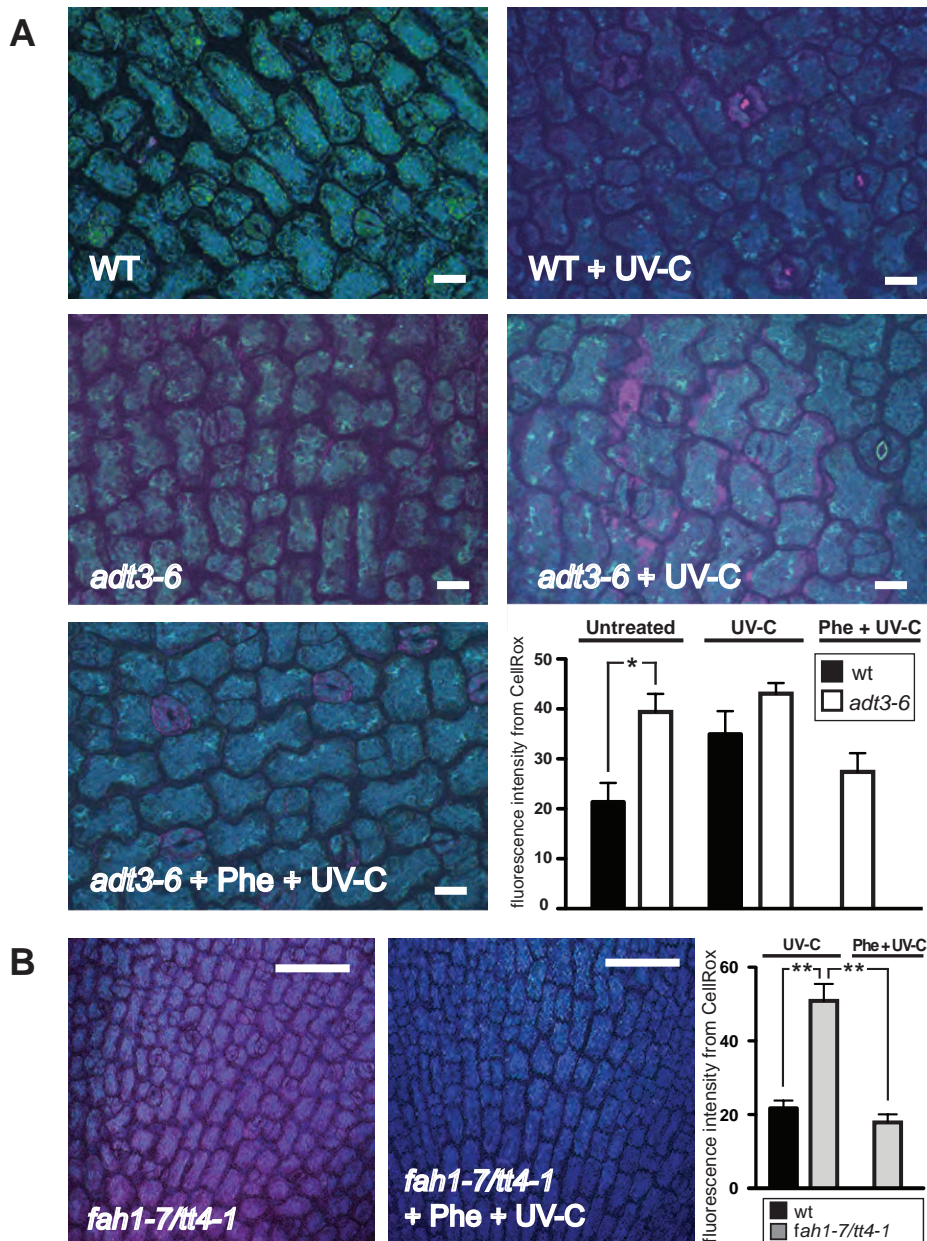

**Figure S3. ROS detection in *adt3-6* mutant by CellRox™.**

**A.** Seedlings were grown and treated as described for Fig. 2. Merged (DAPI, FITC and Cy5) images of the cotyledon epidermis of live 6-d-old dark-grown seedlings of WT and *adt3-6* incubated with CellRox™ Deep Red are shown. WT (top panels) and *adt3-6* (middle panels) 6-d-old dark-grown seedlings were either mock irradiated (control) (left panels, top and middle row) or irradiated with 254 nm (UV-C) (right panels, top and middle row) as described in Methods. *adt3-6* were also treated with 500 $\mu$ M Phe (+Phe) for 3h and then irradiated with 254nm (+UV-C) (bottom left panel). Cy5 fluorescence (false-colored pink) was quantitated in PC in relative artificial units using ImageJ as described in Methods (bar graph, bottom right panel).  $n = \min 6$  quantitated cells of 4 replicates, where each replicate = 20 representative seedlings. Error bars are SEM. \* =  $p < 0.05$ . Feeding Phe to *adt3-6* seedlings 3h before irradiation was able to prevent ROS accumulation (bottom left panel and bar graph). All scale bars = 10 $\mu$ m. **B.** ROS were detected in the epidermis of 6-d-old dark-grown *fah1-7/tt4-1* seedlings pre-treated with 0.5XMS/MES (control) (left panel) or Phe (middle panel) for 3h before UV-C irradiation. Scale bars = 50 $\mu$ m.  $n = 3$  replicates (20-30 seedlings per replicate). Quantification of CellRox™ signal (Cy5 LED) in pavement cells is shown in the bar graph in relative artificial units. Error bars are SEM. \*\* =  $p < 0.01$ .
